# Supplementary material
Source: PubMed Central journal article supplement (PMC4530057)
Supplement: NIHMS710158-supplement.pdf [file NIHMS710158-supplement.pdf]

## Supplementary Materials for

# Whole-genome sequencing of uropathogenic *Escherichia coli* reveals long evolutionary history of diversity and virulence

Yancy Lo<sup>1†</sup>, Lixin Zhang<sup>2</sup>, Betsy Foxman<sup>3,\*</sup>, Sebastian Zöllner<sup>1,4,\*</sup>

<sup>1</sup> Department of Biostatistics, University of Michigan, Ann Arbor, MI, 48109

<sup>2</sup> Department of Epidemiology and Biostatistics, Department of Microbiology and Molecular Genetics, Michigan State University, East Lansing, MI, 48824

<sup>3</sup> Department of Epidemiology, University of Michigan, Ann Arbor, MI, 48109, USA

<sup>4</sup> Department of Psychiatry, University of Michigan, Ann Arbor, MI, 48109, USA

### **This PDF file includes:**

Supplementary Figure 1

Supplementary Table 1

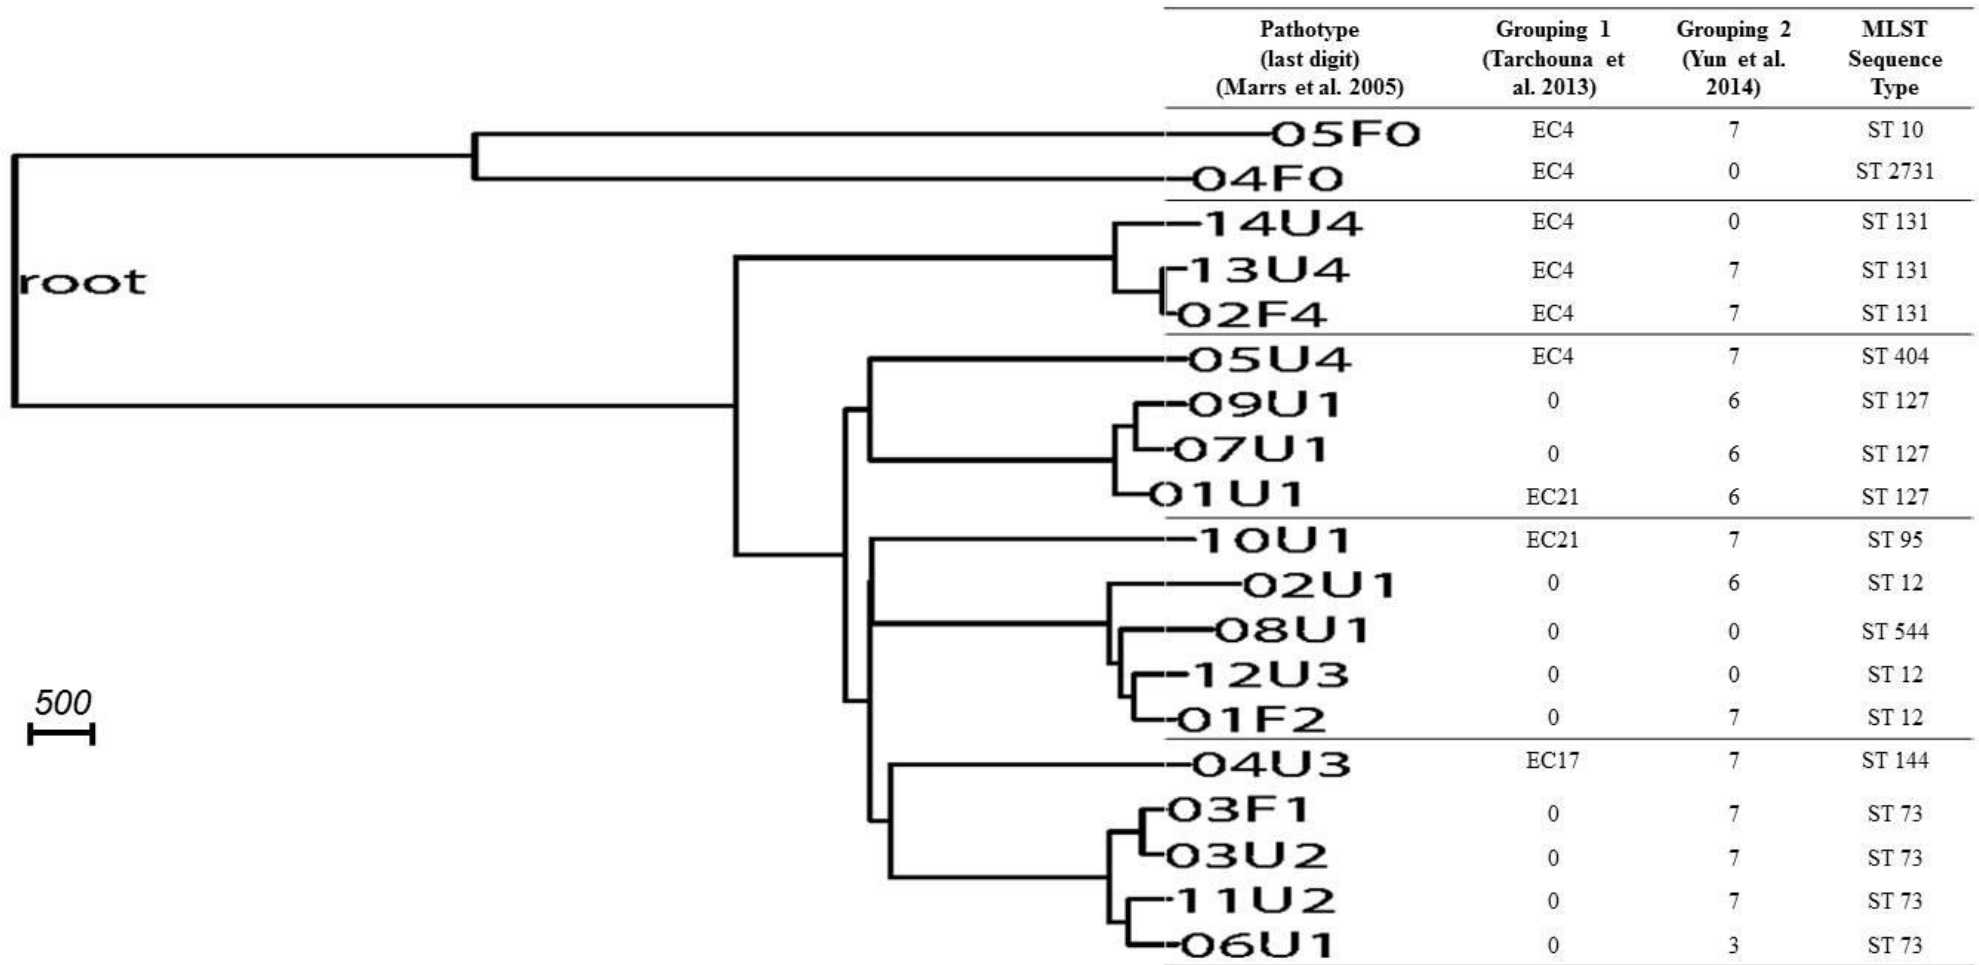

**Supplementary Figure 1.** Classifications based on presence and absence of several virulence factors, described in Marrs et al. (2005), Tarchouna et al. (2013) and Yun et al. (2014). We also listed the multilocus sequence typing (MLST) of our sample based on presence and absence of seven housekeeping genes. For Groupings 1 and 2, type “0” refers to the combinations of virulence factors in our sampled strains that were not found in the original studies. MLST types correspond well to the whole-genome phylogeny, while none of the groupings based on uropathogenic virulence factors were consistent with the whole-genome clustering. Three pathotype 4 strains formed a significant subclade, but the remaining pathotype 4 strain had a split with this subclade over 10 million generations ago. Similarly, using Grouping 2, three type 6 strains formed a significant subclade, while the remaining type 6 strain showed a deep split with this subclade over 7 million generations ago.
